# Supplementary material for: Teachers’ responses to racism and racist bullying in Dutch primary schools
Source: Frontiers journal article supplement (doi:10.3389/fpsyg.2024.1393719), 2025-01-23
Supplement: Table_1.pdf [file Table_1.pdf]

## Appendix 1 - Topic Guide Semi-structured Interviews

*Italic text/questions are optional and depend on previously given answers.*

| Determinant                                                                                               | Questions                                                                                                                                                                                                                                                                                               |
|-----------------------------------------------------------------------------------------------------------|---------------------------------------------------------------------------------------------------------------------------------------------------------------------------------------------------------------------------------------------------------------------------------------------------------|
| <b>Teachers' experiences</b><br><br><b>Teachers' beliefs</b>                                              | <p>According to the safety monitor, 11% of pupils in grades 6 up to 8 have experienced bullying sometimes or often in the last two school years (<i>at least once a month</i>) (van den Broek et al., 2022). What are your experiences from the past period?</p>                                        |
|                                                                                                           | <p>In doing so, pupils will also have experienced racist bullying. What are your experiences regarding racist bullying?</p>                                                                                                                                                                             |
| <b>Teachers' knowledge about racist bullying</b>                                                          | <p>What is racist bullying according to you?</p>                                                                                                                                                                                                                                                        |
|                                                                                                           | <p>How easy do you find it to distinguish between interpersonal bullying and racist bullying?</p> <p><i>How do you make this distinction?</i></p>                                                                                                                                                       |
| <b>Teachers' experiences</b><br><br><b>Teachers' beliefs</b><br><br><b>Teachers' outcome expectations</b> | <p>Have you ever experienced racist bullying among pupils?</p> <p><i>How did you feel about it?</i></p> <p><i>Is it discussed in class?</i></p> <p>Or → How would you handle racist bullying if you saw it among pupils?</p> <p><i>Optional: give examples</i></p> <p><i>Continue at question:*</i></p> |
| <b>Teachers' beliefs, attitude, experiences and skills towards racist bullying</b>                        | <p>How did you deal with it?</p> <p><i>reaction towards bully</i></p> <p><i>reaction towards victim</i></p> <p><i>reaction towards bystander</i></p>                                                                                                                                                    |
|                                                                                                           | <p>How do you feel about that afterwards?</p>                                                                                                                                                                                                                                                           |
| <b>Teachers' perceived behavior of others</b>                                                             | <p>How do pupils who witness racist bullying respond?</p>                                                                                                                                                                                                                                               |
|                                                                                                           | <p>*What have you seen or heard about this from other teachers?</p> <p>And from parents?</p>                                                                                                                                                                                                            |
|                                                                                                           | <p>How do you handle racist 'jokes' or comments in class?</p>                                                                                                                                                                                                                                           |

|                                                                                   |                                                                                                                                                                                                                                                                                                                                             |
|-----------------------------------------------------------------------------------|---------------------------------------------------------------------------------------------------------------------------------------------------------------------------------------------------------------------------------------------------------------------------------------------------------------------------------------------|
| <b>Teachers' skills, beliefs and perceived competence towards racist bullying</b> | <p><i>Optional: outline scenarios</i></p> <p><i>reaction towards bully</i></p> <p><i>reaction towards victim</i></p> <p><i>reaction towards bystander</i></p> <p><i>Is it discussed in class/Would you discuss it in class?</i></p>                                                                                                         |
|                                                                                   | <p>What strategies do you think are effective in countering racist bullying behavior?</p> <p><i>response to bully</i></p> <p><i>response to victim</i></p> <p><i>response to bystander</i></p> <p>What is not effective?</p> <p><i>response to bully</i></p> <p><i>reaction towards victim</i></p> <p><i>reaction towards bystander</i></p> |
| <b>Teachers' perceived competence</b>                                             | <p>To what extent do you feel that you have enough knowledge and skills to handle racist bullying?</p> <p>(Negative → What could help with this?)</p>                                                                                                                                                                                       |
| <b>Teachers' skills</b>                                                           | <p>What skills do you think are important to address racist bullying?</p> <p><i>response to bully</i></p> <p><i>response to victim</i></p> <p><i>response to bystander</i></p>                                                                                                                                                              |
| <b>Teachers' knowledge about racism</b>                                           | <p><i>Announcing transition to racism</i></p> <p>Was the topic of racism discussed in your teacher education program?</p> <p>Yes → How was it discussed?</p> <p>No → In hindsight, would you have felt the need to have it discussed?</p> <p><i>Did you ever receive in-service training on this?</i></p>                                   |

|                                                                                                                             |                                                                                                                                                                                                                                                                                                                                       |                             |                                                                   |
|-----------------------------------------------------------------------------------------------------------------------------|---------------------------------------------------------------------------------------------------------------------------------------------------------------------------------------------------------------------------------------------------------------------------------------------------------------------------------------|-----------------------------|-------------------------------------------------------------------|
| <b>Teachers' attitudes towards different cultures</b>                                                                       | To what extent do you reflect on other cultures in your classroom?<br><br><i>What is the reason for this?</i><br><br><i>To what extend does the cultural background of pupils in class play a role in this?</i><br><br><i>How important do you think it is to reflect on this?</i>                                                    |                             |                                                                   |
|                                                                                                                             | Do you ever discuss racism in class?                                                                                                                                                                                                                                                                                                  |                             |                                                                   |
|                                                                                                                             | <b>Yes</b>                                                                                                                                                                                                                                                                                                                            |                             | <b>No</b>                                                         |
| <b>Class climate Teachers' tools?</b>                                                                                       | In what ways do you discuss this in class?<br><br><i>Also in relation to the postcolonial past and heritage?</i><br><br><i>Or: also from a historical perspective?</i><br><br><i>How are projects around museums/museum objects, monuments, historical sites, traditions/cultural practices used?</i><br><br>How do students respond? | <b>Outcome expectations</b> | How would you expect students to react if you were to discuss it? |
| <b>Teachers' tools</b>                                                                                                      | What teaching materials do you have available to discuss racism?<br><br><i>How do these materials help?</i>                                                                                                                                                                                                                           |                             |                                                                   |
| The topic of racism appears to be very uncomfortable for teachers to discuss in class (Sijpenhof 2021, Yared et al., 2020). |                                                                                                                                                                                                                                                                                                                                       |                             |                                                                   |

|                                          |                                                                                                                                                                                                                   |                                          |                                                                              |
|------------------------------------------|-------------------------------------------------------------------------------------------------------------------------------------------------------------------------------------------------------------------|------------------------------------------|------------------------------------------------------------------------------|
| <b>Teachers' attitude towards racism</b> | How comfortable or uncomfortable do you find it to discuss this in class?                                                                                                                                         | <b>Teachers' attitude towards racism</b> | How comfortable or uncomfortable would you find it to discuss this in class? |
| <b>Teachers' tools</b>                   | What <i>helps/would help</i> to make it easy to discuss?                                                                                                                                                          | <b>Teachers' tools</b>                   | What do you think would help to make it easy to discuss?                     |
| <b>Teachers' perceived competence</b>    | How competent do you feel in teaching about racism?                                                                                                                                                               |                                          |                                                                              |
| <b>School climate</b>                    | <p>How does your school deal with racism?</p> <p><i>And with racist bullying?</i></p> <p><i>Is there anything in the school policy about it?</i></p> <p><i>Does it come up at e.g. teacher consultations?</i></p> |                                          |                                                                              |
|                                          | What advice would you like to give other teachers in addressing racist bullying?                                                                                                                                  |                                          |                                                                              |
| <b>Racial identity</b>                   | <p><i>How would you describe your own racial identity?</i></p> <p>To what extent are you aware of your own racial identity in relation to racism?</p>                                                             |                                          |                                                                              |
| Lesson plan                              | <p>What do you think should be included in the lesson plan?</p> <p><i>(regarding historical or cultural heritage, and current cultural events, such as e.g. Keti Koti/Ramadan)</i></p>                            |                                          |                                                                              |
